# Supplementary material
Source: publisher figshare collection journal article supplement (https://acs.figshare.com/ndownloader/files/3749713)
Supplement: Supplementary file 1 [file 3749713]

## Supporting Information

### **Metal Ion Complexes of *N,N'*-Bis(2-Pyridylmethyl)-*trans*-1,2-Diaminocyclohexane-*N,N'*-Diacetic Acid, H<sub>2</sub>bpcd; Cis/Trans Isomerization Equilibria**

Jan Florián,<sup>±</sup> Craig C. McLauchlan,<sup>#</sup> Daniel S. Kissel,<sup>±</sup> Chad C. Eichman,<sup>±</sup> and Albert W. Herlinger<sup>\*,±</sup>

<sup>±</sup>Department of Chemistry and Biochemistry, Loyola University Chicago, 1032 W Sheridan Rd., Chicago, IL 60660 USA

<sup>#</sup>Department of Chemistry, Illinois State University, Campus Box 4160, Normal, IL 61790-4160 USA



a)

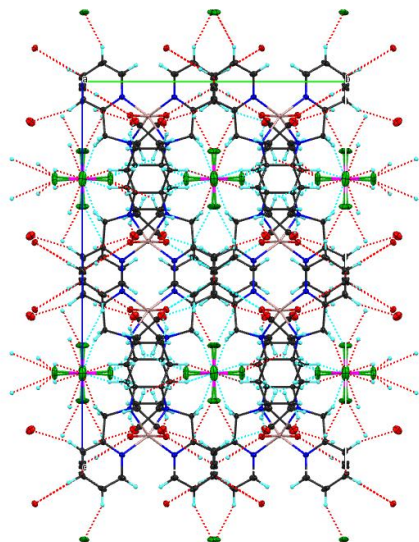

b)

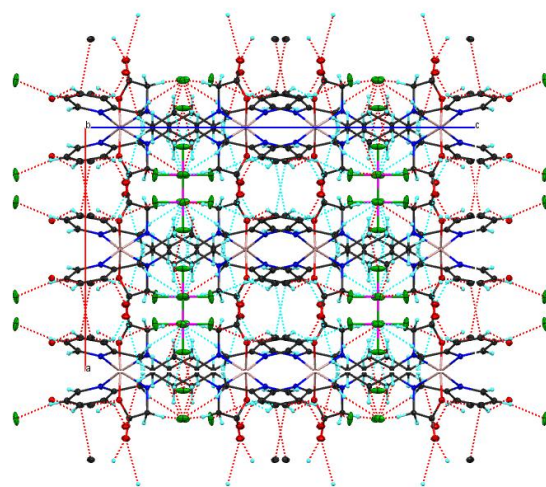

c)

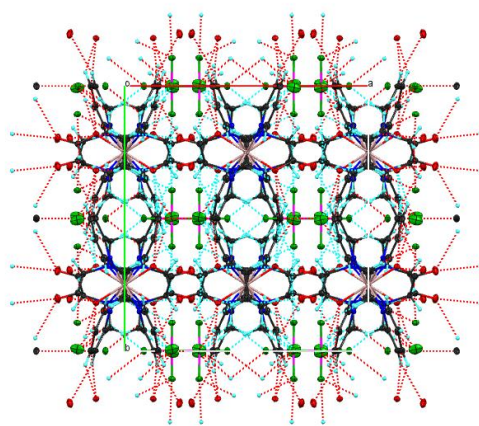

**Figure S2.** Packing diagrams of [Ga(bpcd)]PF<sub>6</sub> shown along a) *a*, b) *b*, and c) *c*. Short interactions inside the unit cell are shown in cyan.

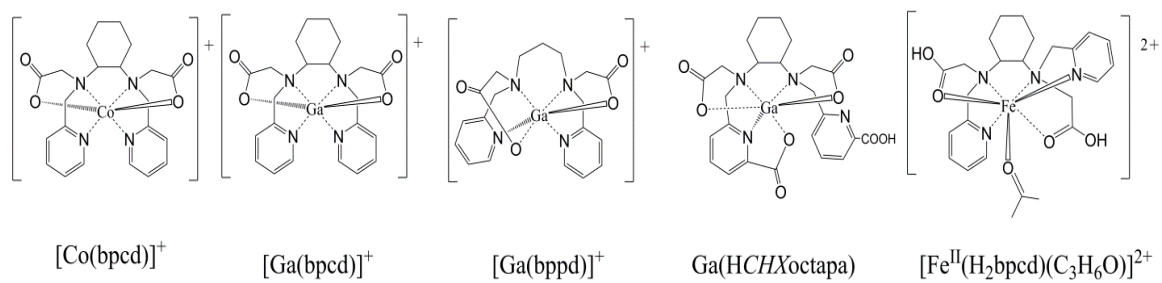

**Figure S3.** Species represented in Tables S1 and S2.

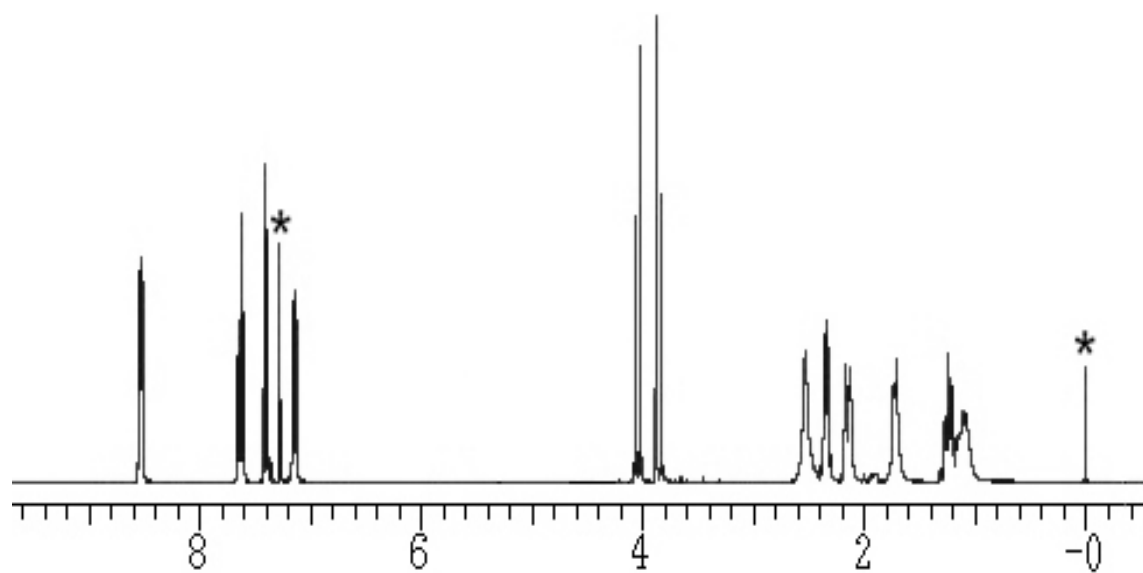

**Figure S4.**  $^1\text{H}$  NMR spectrum for *N,N'*-bis(2-pyridylmethyl)-1,2-diaminocyclohexane, bpmdac, in  $\text{CDCl}_3$  at  $25^\circ\text{C}$ .

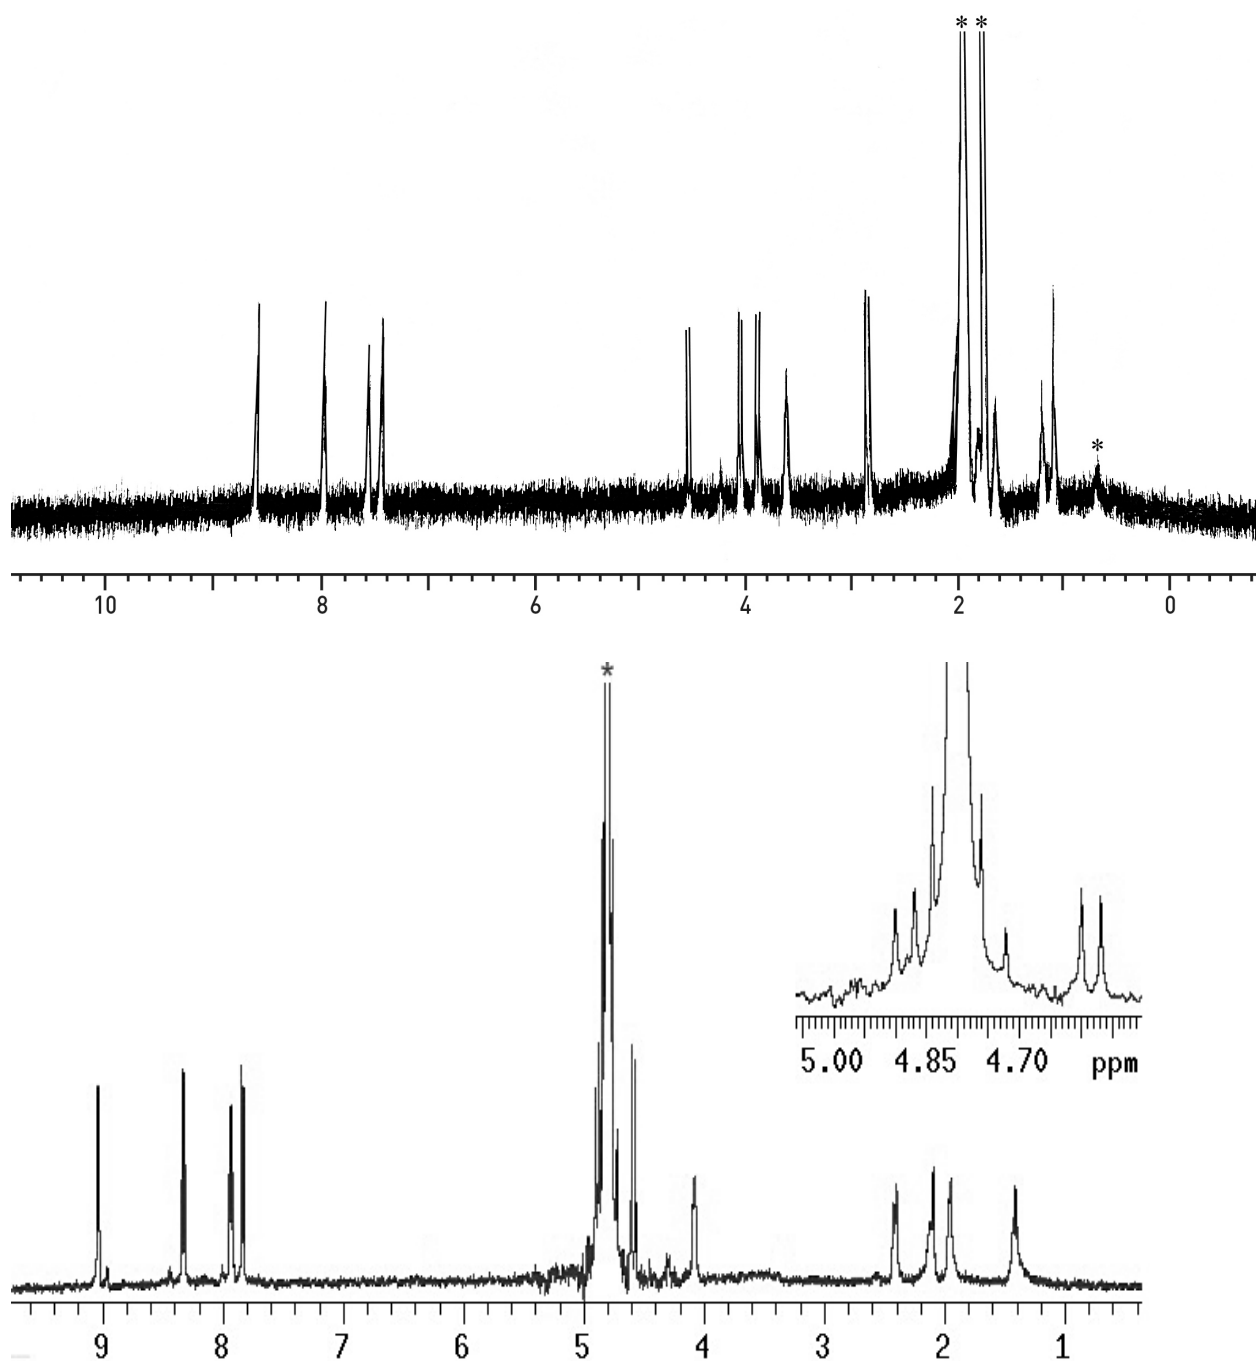

**Figure S5.**  $^1\text{H}$  NMR spectra of  $[\text{Co}(\text{bpcd})]^+$  in  $\text{CD}_3\text{CN}$  (top) and  $\text{D}_2\text{O}$  (bottom) at  $25\text{ }^\circ\text{C}$ , the \* indicates solvent or an impurity. The insert expands the region around the solvent signal. Signals centered at 2.85 and 3.90 ppm ( $\Delta\nu_{\text{AB}}/J = 28.7$ ), and 4.07 and 4.57 ppm ( $\Delta\nu_{\text{AB}}/J = 16.8$ ) in the  $\text{CD}_3\text{CN}$  spectrum (top) have relative intensity four and are assigned as the methylene *AX* quartets.

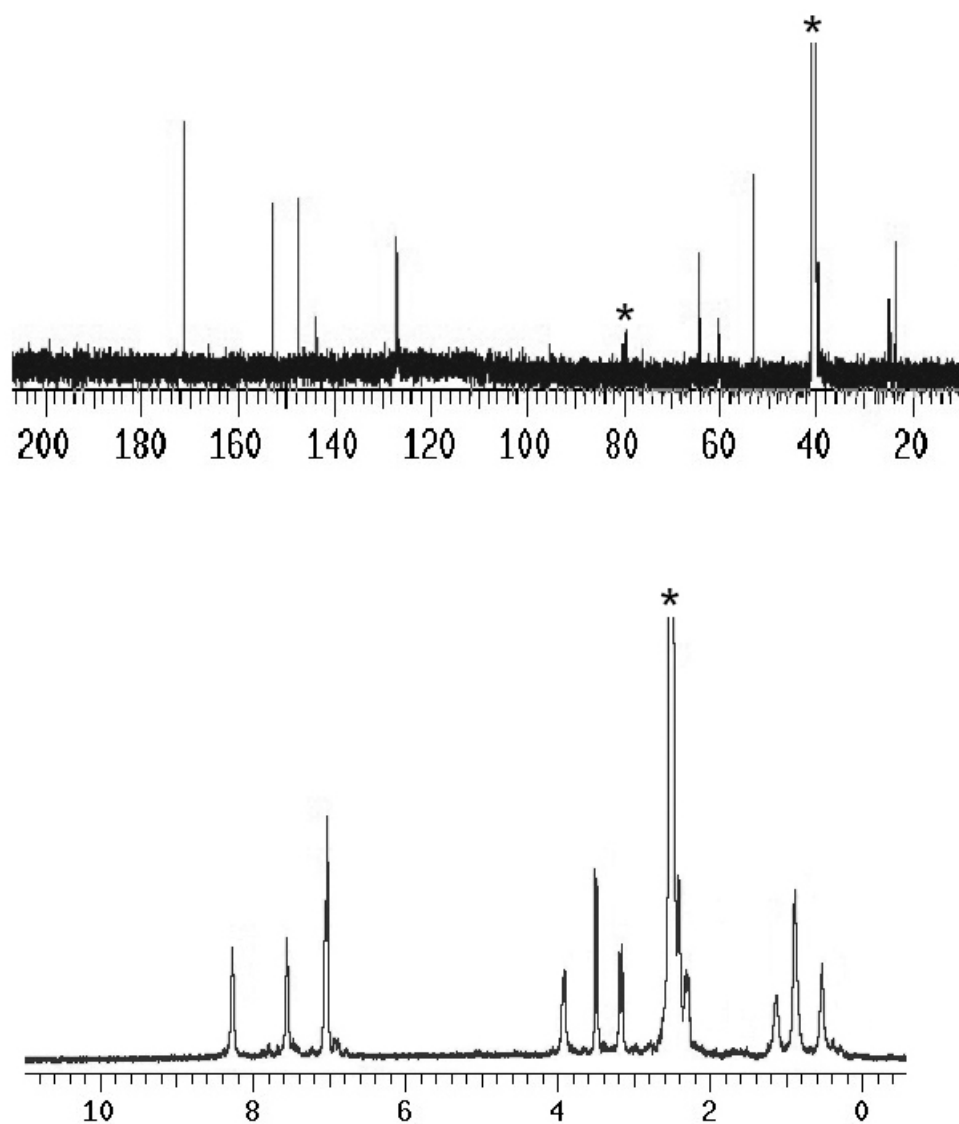

**Figure S6.**  $^{13}\text{C}$  NMR spectrum (top) and  $^1\text{H}$  NMR spectrum (bottom) of  $[\text{Ga}(\text{bpcd})]^+$  in  $\text{DMSO-d}_6$  at  $25^\circ\text{C}$ , the \* indicates solvent or an impurity. The signals in the  $^1\text{H}$  NMR spectrum centered at Signals centered at 2.30 and 3.49 ppm, and 3.17 and 3.92 ppm are assigned as the pendant arm methylene *AX* quartets.

**Table S1.** Bond Distances (Å) and Experimental Data for Co(bpcd)<sup>+</sup>, Ga(bpcd)<sup>+</sup>, Ga(bppd)<sup>+</sup>, Ga(HCHXoctapa), and [Fe<sup>II</sup>(H<sub>2</sub>bpcd)(C<sub>3</sub>H<sub>6</sub>O)]<sup>2+</sup>. Structures are show in Figure S3.

| Bond (Å)                                              | Co(bpcd) <sup>+a</sup> | Ga(bpcd) <sup>+b</sup> | Ga(bppd) <sup>+c</sup> | Ga(HCHXoctapa) <sup>d</sup> | [Fe <sup>II</sup> (H <sub>2</sub> bpcd)(C <sub>3</sub> H <sub>6</sub> O)] <sup>2+e</sup> |
|-------------------------------------------------------|------------------------|------------------------|------------------------|-----------------------------|------------------------------------------------------------------------------------------|
| M–O <sub>ac1</sub>                                    | 1.8868 (8)             | 1.9343 (9)             | 1.9459 (15)            | 1.953 (3)                   | 2.293 (2)                                                                                |
| M–O <sub>ac2</sub>                                    | *                      | 1.9344 (9)**           | 1.8956 (14)            | 1.894 (3)                   | 2.288 (2)                                                                                |
| M–N <sub>am1</sub>                                    | 1.9548 (9)             | 2.0866 (10)            | 2.0673 (16)            | 2.152 (4)                   | 2.309 (3)                                                                                |
| M–N <sub>am2</sub>                                    | *                      | *                      | 2.1061 (17)            | 2.174 (3)                   | 2.300 (3)                                                                                |
| M–N <sub>py1</sub>                                    | 1.9448 (9)             | 2.0574 (10)            | 2.0156 (17)            | 1.999 (3)                   | 2.162 (3)                                                                                |
| M–N <sub>py2</sub>                                    | *                      | 2.0575 (10)**          | 2.1377 (17)            | ***                         | 2.163 (3)                                                                                |
| C–O <sub>ac1</sub>                                    | 1.3029 (13)            | 1.3025 (15)            | 1.286 (3)              | 1.293 (5)                   | 1.308 (6)                                                                                |
| C=O <sub>ac1</sub>                                    | 1.2212 (14)            | 1.2151 (15)            | 1.211 (3)              | 1.216 (5)                   | 1.226 (4)                                                                                |
| C–O <sub>ac2</sub>                                    | *                      | *                      | 1.287 (3)              | 1.319 (5)                   | 1.297 (6)                                                                                |
| C=O <sub>ac2</sub>                                    | *                      | *                      | 1.208 (3)              | 1.208 (5)                   | 1.235 (5)                                                                                |
| M–O <sub>ac3</sub> of<br>py                           |                        |                        |                        | 1.959 (3)                   |                                                                                          |
| C–O <sub>ac3</sub> of<br>py                           |                        |                        |                        | 1.301 (5)                   |                                                                                          |
| C=O <sub>ac3</sub> of<br>py                           |                        |                        |                        | 1.215 (5)                   |                                                                                          |
| M–O <sub>acetone</sub><br>M above<br>N/N/N/X<br>plane | 0****                  | 0****                  | 0.0387 (9)             | 0.136***                    | 2.172 (2)<br>*****                                                                       |
| Temp, K                                               | 100                    | 100                    | 296                    | 100                         | 150                                                                                      |

<sup>a</sup>McLauchlan et al.<sup>16</sup> <sup>b</sup>This work. <sup>c</sup>Kissel et al.<sup>15</sup> <sup>d</sup>Ramogida et al.<sup>8</sup> with values from deposited data, not as reported in manuscript. <sup>e</sup>Oddon et al.<sup>10</sup> \*N/A. Symmetry equivalent. \*\* Symmetry equivalent, but a difference in the distances is noted in the refinement output file. \*\*\* N/A. N<sub>3</sub>O<sub>3</sub> donor set. This plane is closest to the plane that would contain the cyclohexyl unit, i.e. it contains the two N<sub>am</sub>, 1 N<sub>pyr</sub>, and O<sub>ac3</sub> of py. \*\*\*\*\* Special position. \*\*\*\*\* N/A. Not a relevant descriptor for 7-coordinate geometry. Reference numbers refer to the numbering in the main manuscript

**Table S2.** Selected Bond Angles (°) for Co(bpcd)<sup>+</sup>, Ga(bpcd)<sup>+</sup>, Ga(bppd)<sup>+</sup>, Ga(HCHXoctapa), and [Fe<sup>II</sup>(H<sub>2</sub>bpcd)(C<sub>3</sub>H<sub>6</sub>O)]<sup>2+</sup> Structures. Structures are show in Figure S3.

| Angle (deg)                           | Co(bpcd) <sup>+</sup> <sup>a</sup> | Ga(bpcd) <sup>+</sup> <sup>b</sup> | Ga(bppd) <sup>+</sup> <sup>c</sup> | Ga(HCHXoctapa) <sup>d</sup> | [Fe <sup>II</sup> (H <sub>2</sub> bpcd)(C <sub>3</sub> H <sub>6</sub> O)] <sup>2+</sup> <sup>e</sup> |
|---------------------------------------|------------------------------------|------------------------------------|------------------------------------|-----------------------------|------------------------------------------------------------------------------------------------------|
| O <sub>ac1</sub> –M–O <sub>ac2</sub>  | 176.08 (5)                         | 176.56 (5)                         | 91.83 (7)                          | 92.89 (13)                  | 152.23 (8)                                                                                           |
| N <sub>am1</sub> –M–N <sub>am2</sub>  | 89.33 (5)                          | 85.30 (5)                          | 96.47 (7)                          | 81.92 (12)                  | 76.96 (10)                                                                                           |
| N <sub>pyr1</sub> –M–N <sub>py2</sub> | 106.74 (5)                         | 114.95 (6)                         | 90.80 (6)                          | **                          | 177.41 (11)                                                                                          |
| N <sub>am1</sub> –M–N <sub>py1</sub>  | 82.17 94)                          | 80.51 (4)                          | 81.46 (7)                          | 79.77 (14)                  | 75.64 (11)                                                                                           |
| N <sub>am2</sub> –M–N <sub>py2</sub>  | *                                  | *                                  | 80.39 (7)                          | **                          | 76.50 (11)                                                                                           |
| N <sub>am1</sub> –M–O <sub>ac1</sub>  | 87.84 (4)                          | 85.36(4)                           | 83.59 (7)                          | 82.94 (12)                  | 70.27 (10)                                                                                           |
| N <sub>pyr1</sub> –M–O <sub>ac1</sub> | 89.92 (4)                          | 91.19 (4)                          | 99.41 (7)                          | 89.13 (13)                  | 99.00 (11)                                                                                           |
| O=C–O <sub>ac</sub>                   | 124.95 (10)                        | 125.09 (12)                        | 125.0 (3)                          | 124.9 (4)                   | 124.26                                                                                               |
|                                       | *                                  | *                                  | 123.5 (2)                          | 125.1 (4)                   | 124.32                                                                                               |
|                                       |                                    |                                    |                                    | 114.3 (4)                   |                                                                                                      |
| C(O)–O <sub>ac</sub> –M               | 114.57 (7)                         | 115.26 (8)                         | 117.81 (15)                        | 117.6 (3)                   | 112.54                                                                                               |
|                                       | *                                  | *                                  | 114.77 (14)                        | 117.4 (3)                   | 111.65                                                                                               |
|                                       |                                    |                                    |                                    | 116.9 (3)                   |                                                                                                      |

<sup>a</sup>McLauchlan et al.<sup>16</sup> <sup>b</sup>This work. <sup>c</sup>Kissel et al.<sup>15</sup> <sup>d</sup>Ramogida et al.<sup>8</sup> with values from deposited data, not as reported in manuscript. <sup>e</sup>Oddon et al.<sup>14</sup> \*N/A. Symmetry equivalent. \*\* N/A. N<sub>3</sub>O<sub>3</sub> donor set. Reference numbers refer to the numbering in the main manuscript
